# Supplementary material
Source: PubMed Central journal article supplement (PMC6749546)
Supplement: jamapediatr-173-e192841-s001.pdf [file jamapediatr-173-e192841-s001.pdf]

## Supplementary Online Content

Jebeile H, Gow ML, Baur LA, Garnett SP, Paxton SJ, Lister NB. Association of pediatric obesity treatment, including a dietary component, with change in depression and anxiety: a systematic review and meta-analysis. *JAMA Pediatr*. Published online September 16, 2019. doi:10.1001/jamapediatrics.2019.2841

**eTable 1.** Search strategy used on the Ovid platform with the Medline database

**eTable 2.** Characteristics of included studies

**eFigure 1.** Meta-regression of the effect size for change in symptoms of depression between pre- and post-intervention and mean participant BMI z-score at baseline following professionally administered obesity treatment with a dietary component in children and adolescents with overweight and obesity ( $R^2=0.18$ ,  $p=0.02$ )

**eFigure 2.** Meta-regression of the effect size for change in symptoms of anxiety between pre- and post-intervention and intervention duration following professionally administered obesity treatment with a dietary component in children and adolescents with overweight and obesity ( $R^2=0.82$ ,  $p<0.001$ )

**eFigure 3.** Meta-analysis of the change in weight-related outcomes between pre- and post-intervention (A) and between baseline and the latest follow-up timepoint (B), following obesity treatment with a dietary component in children and adolescents with overweight and obesity

**eReferences.**

This supplementary material has been provided by the authors to give readers additional information about their work.

**eTable 1.** Search strategy used on the Ovid platform with the Medline database

Search terms contained reference to all three criteria: overweight/obesity, dietary treatment interventions, and depression/anxiety. Medical Subject Headings (MeSH) are bolded, and key word searches are italicised.

|                                                                                                            |                                                                                                                                                                                          |
|------------------------------------------------------------------------------------------------------------|------------------------------------------------------------------------------------------------------------------------------------------------------------------------------------------|
| 1 exp <b>Obesity/</b>                                                                                      | 21 <i>depress*.tw.</i>                                                                                                                                                                   |
| 2 exp <b>Overweight/</b>                                                                                   | 22 <b>depression/</b>                                                                                                                                                                    |
| 3 <i>obes*.tw.</i>                                                                                         | 23 <b>Anxiety/</b>                                                                                                                                                                       |
| 4 <i>overweight.tw.</i>                                                                                    | 24 <i>anxi*.tw.</i>                                                                                                                                                                      |
| 5 1 or 2 or 3 or 4                                                                                         | 25 <i>selfesteem.tw.</i>                                                                                                                                                                 |
| 6 <b>weight loss/</b>                                                                                      | 26 " <b>feeding and eating disorders/</b> or <b>anorexia nervosa/</b> or <b>binge eating disorder/</b> or <b>bulimia nervosa/</b> or " <b>feeding and eating disorders of childhood/</b> |
| 7 exp <b>diet therapy/</b>                                                                                 |                                                                                                                                                                                          |
| 8 exp <b>bariatrics/</b>                                                                                   |                                                                                                                                                                                          |
| 9 exp <b>exercise/</b>                                                                                     | 27 19 or 20 or 21 or 22 or 23 or 24 or 25 or 26                                                                                                                                          |
| 10 <b>anti-obesity agents/</b> or <b>appetite depressants/</b>                                             | 28 <b>feeding behavior/</b>                                                                                                                                                              |
| 11 <i>(diet* adj2 therap*).tw.</i>                                                                         | 29 <i>(bulimi* adj4 symptom*).tw.</i>                                                                                                                                                    |
| 12 <i>bariatric*.tw.</i>                                                                                   | 30 <i>(disorder* adj4 eat*).tw.</i>                                                                                                                                                      |
| 13 <i>(low adj4 (energy or calor*) adj4 diet).tw.</i>                                                      | 31 <i>(emotion* adj4 eat*).tw.</i>                                                                                                                                                       |
| 14 <i>((pharma* or diet* or obes* or lifestyle or behavio*) adj4 (interven* or treat* or therap*)).tw.</i> | 32 <i>(external adj4 eat*).tw.</i>                                                                                                                                                       |
| 15 <i>((calori* or diet*) adj4 (reduc* or restrict*)).tw.</i>                                              | 33 <i>(diet* adj4 restrain*).tw.</i>                                                                                                                                                     |
| 16 <i>(weight adj4 (manag* or los*)).tw.</i>                                                               | 34 <i>(binge adj4 eat*).tw.</i>                                                                                                                                                          |
| 17 <i>exercise.mp. or physical activity.tw.</i>                                                            | 35 <i>extreme weight loss.tw.</i>                                                                                                                                                        |
| 18 6 or 7 or 8 or 9 or 10 or 11 or 12 or 13 or 14 or 15 or 16 or 17                                        | 36 28 or 29 or 30 or 31 or 32 or 33 or 34 or 35                                                                                                                                          |
| 19 <b>Body Image/</b>                                                                                      | 37 5 and 18 and 27                                                                                                                                                                       |
| 20 <i>(body adj4 (accept* or dissatisf* or image or satisf* or appreciat*)).tw.</i>                        | 38 limit 37 to (english language and humans and "all child (0 to 18)                                                                                                                     |

**eTable 2.** Characteristics of included studies

| Author, year; program name (if applicable); country; study design; setting; quality rating                                   | Baseline characteristics of sample – # participants (n), %F; age (y), range and mean (SD); BMI related inclusion criteria, mean (SD) BMI z-score/BMI        | Intervention duration and intensity; duration of follow-up; retention (R)                                                                         | Intervention design: intervention groups (IG)/control (CG); nutrition; physical activity (PA); behavioural components<br><br>Personnel (P) delivering the intervention                                                                                                                                                                                           | Change in weight-related outcomes, mean change (SE)                                                                                                           | Depression (↓, ↑, –) | Anxiety (↓, ↑, –) |
|------------------------------------------------------------------------------------------------------------------------------|-------------------------------------------------------------------------------------------------------------------------------------------------------------|---------------------------------------------------------------------------------------------------------------------------------------------------|------------------------------------------------------------------------------------------------------------------------------------------------------------------------------------------------------------------------------------------------------------------------------------------------------------------------------------------------------------------|---------------------------------------------------------------------------------------------------------------------------------------------------------------|----------------------|-------------------|
| Ampolos et al. 2014 <sup>1</sup> ; USA; setting NR; RCT; neutral                                                             | n=50, 62% F<br><br>8-12y, 10.4 (1.35)y<br><br>BMI ≥ 85 <sup>th</sup> percentile, BMI 24.61 (2.43) kg/m <sup>2</sup><br><br>Groups combined for all analysis | Intervention duration and intensity NR<br><br>Follow-up 6 mo post-intervention<br><br>R: 86%                                                      | IG: TLD; PA education; behaviour change including self-monitoring, stimulus control, goal-setting, and parenting skills<br><br>Wait-list CG: delayed treatment<br><br>P: NR                                                                                                                                                                                      | BMI<br>Pre-post: -0.69 (0.30) kg/m <sup>2</sup> *<br>Pre-FU: -0.11 (0.33) kg/m <sup>2</sup>                                                                   | –                    |                   |
| Boutelle et al. 2018 <sup>2</sup> ; Preventing Emotional Eating Routines (PEER); USA; pre-post; tertiary outpatient; neutral | n=30, 87% F<br><br>13-17y, 14.6 (1.2)y<br><br>BMI 85-99 <sup>th</sup> percentile<br>BMI z-score 2.27 (0.41)                                                 | 4 mo<br><br>16 weekly sessions (60 or 90 min), adolescent alone, parent alone, adolescent and parent combined<br><br>Follow-up 7 mo from baseline | IG: four treatment components - DBT to target emotion regulation, FBT for weight loss (nutrition and PA education; stimulus control, planning ahead, and relapse prevention), behavioural coaching to encourage adherence to DBT and FBT skills, and Emotion-Focused parent training to support the adolescent<br><br>P: Graduate students, post-doc researchers | BMI z-score<br>Pre-post: -0.06 (0.06)<br>Pre-FU: -0.09 (0.06)<br><br>BMI<br>Pre-post: -0.60 (0.81) kg/m <sup>2</sup><br>Pre-FU: -1.0 (0.78) kg/m <sup>2</sup> | ↓                    |                   |

|                                                                                               |                                                                                                                            |                                                                                                                                                                                                                                                |                                                                                                                                                                                                                                                                                                                                                 |                                                                                                                       |   |   |
|-----------------------------------------------------------------------------------------------|----------------------------------------------------------------------------------------------------------------------------|------------------------------------------------------------------------------------------------------------------------------------------------------------------------------------------------------------------------------------------------|-------------------------------------------------------------------------------------------------------------------------------------------------------------------------------------------------------------------------------------------------------------------------------------------------------------------------------------------------|-----------------------------------------------------------------------------------------------------------------------|---|---|
|                                                                                               |                                                                                                                            | <b>R:</b> 70% at 4mo; follow-up NR                                                                                                                                                                                                             |                                                                                                                                                                                                                                                                                                                                                 |                                                                                                                       |   |   |
| Brehm et al. 2003 <sup>3</sup> ; USA; community; pre-post; neutral                            | n=92, 100% F<br><br>8-15y, 11.09 (1.65)y<br>120-130% above ideal body weight<br>BMI 29.34 (4.73) kg/m <sup>2</sup>         | 6 mo<br><br>12x90 min sessions<br><br>Follow-up 12 mo from baseline<br><br><b>R:</b> 62%                                                                                                                                                       | <b>IG:</b> Multidisciplinary weight-management program, group nutritional education; exercise techniques for stress management; behaviour modification including goal setting, self-reward, buddy system, body image, self-esteem, anxiety<br><br><b>P:</b> Multidisciplinary team                                                              | <b>BMI</b><br>Pre-post: 0.31 (0.49) kg/m <sup>2</sup><br>Pre-FU: 1.01 (0.50) kg/m <sup>2</sup>                        |   | ↓ |
| Brennan et al. 2012 <sup>4</sup> ; CHOOSE Health Program; Australia; community; RCT; positive | n=63 (IG 42, CG 21), 54% F<br><br>11-19y, 14.3 (1.9)y<br><br>Overweight/obesity BMI z-score IG 2.08 (0.37), CG 2.08 (0.40) | 16 wk<br><br>10x60 min weekly individual face-to-face sessions + one phone call, then 2x60 minute sessions biweekly<br><br>6 mo maintenance phase: 2x60 min visits + 7x15 min phone calls<br><br>Nil follow-up<br><br><b>R:</b> IG 48%, CG 67% | <b>IG:</b> nutrition and PA education; CBT to assist adolescent and family to manage the environmental, social and psychological barriers to change, goal setting, self-monitoring, eating behaviours, problem solving<br><br><b>Wait-list CG:</b> offered treatment after 6 mo while IG in the maintenance phase<br><br><b>P:</b> Psychologist | <b>BMI z-score</b><br>IG, Pre-post: -0.09 (0.05)<br>Pre-FU: -0.10 (0.053)<br><br>CG, pre-post: 0.01 (0.07)<br>Nil FU  | - | - |
| Crocker et al. 2012 <sup>5</sup> ; UK; primary care; RCT; positive                            | n=72 (IG 37, CG 35), 69% F<br><br>8-12y, 10.3 (1.6)y<br><br>Overweight/obesity defined by IOTF<br>BMI z-score 3.14 (0.72)  | 6 mo<br><br>15 sessions: 10 weekly, 3 biweekly, 2 monthly<br><br>Follow-up 10 mo from baseline                                                                                                                                                 | <b>IG:</b> FBT including whole family lifestyle change; nutrition education based on the TLD and Eatwell plate; PA education; behavioural programme including self-monitoring, goal setting, and stimulus control                                                                                                                               | <b>BMI z-score</b><br>IG, pre-post: -0.11 (0.028)*<br>CG, pre-post: -0.10 (0.027)*<br><br><b>BMI</b><br>IG, pre-post: | - |   |

|                                                                                                                                                                                 |                                                                                                                                                                                                           |                                                                                                                                                                                                     |                                                                                                                                                                                                                                                                                                                                                                                                                            |                                                                                                                                                                                                               |   |  |
|---------------------------------------------------------------------------------------------------------------------------------------------------------------------------------|-----------------------------------------------------------------------------------------------------------------------------------------------------------------------------------------------------------|-----------------------------------------------------------------------------------------------------------------------------------------------------------------------------------------------------|----------------------------------------------------------------------------------------------------------------------------------------------------------------------------------------------------------------------------------------------------------------------------------------------------------------------------------------------------------------------------------------------------------------------------|---------------------------------------------------------------------------------------------------------------------------------------------------------------------------------------------------------------|---|--|
|                                                                                                                                                                                 |                                                                                                                                                                                                           | <b>R:</b> IG 59%, CG 97% at 6 mo and 10 mo                                                                                                                                                          | <b>Waitlist-CG:</b> completed treatment following 6 mo on wait-list<br><br><b>P:</b> Multidisciplinary team                                                                                                                                                                                                                                                                                                                | -0.36 (0.19) kg/m <sup>2</sup> *<br>CG, pre-post:<br>-0.03 (0.18) kg/m <sup>2</sup>                                                                                                                           |   |  |
| Daley et al. 2006 <sup>6</sup> ; The Sheffield Obesity Trial; England; RCT; community; positive<br><br>(only the IG and wait-list control group have been included in analysis) | n=81 (IG 28, placebo CG 23, wait-list CG 30), 56% F<br><br>11-16y, 13.1y (SD NR)<br><br>BMI > 98 <sup>th</sup> percentile<br>BMI z-score IG 3.17 (0.33), placebo CG 3.22 (0.61), wait-list CG 3.32 (0.37) | 14 wk<br><br>3 x 1 hr, one-on-one sessions/wk for 8 wk, then 6 wk unsupervised home exercise program<br><br>Follow-up 28 wk from baseline<br><br><b>R:</b> IG 86%, placebo CG 96%, wait-list CG 83% | <b>IG:</b> dietary advice information sheet trial entry, nutrition education; 30 min moderate intensity aerobic exercise sessions including games for 8 wk, then 6 wk individualised home exercise program; CBT strategies, goal setting, self-monitoring, social support with structured curriculum.<br><br><b>Wait-list CG:</b> Offered exercise therapy at the follow-up assessment<br><br><b>Personnel:</b> Researcher | <b>BMI z-score</b><br>IG, pre-post: 0.05 (0.05)<br>Pre-FU: -0.01 (0.05)<br><br>Placebo CG, pre-post: 0.02 (0.11)<br>Pre-FU: 0.01 (0.10)<br><br>Wait-list CG, pre-post: -0.10 (0.05)*<br>Pre-FU: -0.15 (0.05)* | ↓ |  |
| Danielsen et al. 2013 <sup>7</sup> ; Norway; RCT; community; neutral                                                                                                            | n=49 (IG 23, CG 26), 49% F<br><br>7-13y, 10.68 (1.24)y<br><br>Obesity as defined by IOTF<br>BMI z-score 2.53 (0.34)                                                                                       | 9 mo<br><br>12x 45 min/wk family meeting, booster session 6 mo post-treatment<br><br>Follow-up 15 mo from baseline<br><br><b>R:</b> IG 87%, CG 69%                                                  | <b>IG:</b> FBT; nutrition education based on Nordic dietary guidelines; increase PA (30 min/d), reduce sedentary activity; CBT, develop family and individual coping skills e.g. goal setting, self-monitoring, self-esteem, body image, problem solving, and a positive self-perception.<br><br><b>Waitlist-CG:</b> commenced treatment after 12 wk on wait-list<br><br><b>P:</b> Clinical psychologist                   | <b>BMI z-score</b> Combined groups<br>Pre-post:<br>-0.18 (0.051)*<br>Pre-FU: -0.18 (0.06)*                                                                                                                    | ↓ |  |
| DeBar et al. 2012 <sup>8</sup> ; USA; RCT; primary care; positive                                                                                                               | n=208 (IG1 105, IG2 103), 100% F<br><br>12-17y, 14.1 (1.4)y                                                                                                                                               | 5 mo                                                                                                                                                                                                | <b>IG1:</b> nutrition education, 1600-1800 kcal/d; PA education with targets of 30-60 min of PA/d, on 5 d/wk, 15 min/d yoga, limiting screen time to 2 hr/d; behavioural                                                                                                                                                                                                                                                   | <b>BMI z-score</b><br>IG1, pre-post:<br>-0.12 (0.03)*<br>Pre-FU: -0.15 (0.04)*                                                                                                                                |   |  |

|                                                                                       |                                                                                                                |                                                                                                                                                                              |                                                                                                                                                                                                                                                                                                                                                                                                                                                                                                                            |                                                                                                                |   |  |
|---------------------------------------------------------------------------------------|----------------------------------------------------------------------------------------------------------------|------------------------------------------------------------------------------------------------------------------------------------------------------------------------------|----------------------------------------------------------------------------------------------------------------------------------------------------------------------------------------------------------------------------------------------------------------------------------------------------------------------------------------------------------------------------------------------------------------------------------------------------------------------------------------------------------------------------|----------------------------------------------------------------------------------------------------------------|---|--|
|                                                                                       | BMI $\geq$ 90 <sup>th</sup> percentile<br>BMI z-score IG1 2.00 (0.34), IG2 2.00 (0.33)                         | 90 min meeting/wk for 3 mo, then biweekly for 2 mo<br><br>Follow-up 12 mo from baseline<br><br><b>R:</b> IG1 95%, IG2 92% at 5 mo; IG1 86%, IG2 81% at 12 mo                 | component including self-monitoring, goal setting, stimulus control and addressing issues associated with obesity in adolescent girls including depression, disordered eating and body image<br><br><b>IG2:</b> usual care; written education material, including evidence-based approaches to weight management; parents' guide, local resources, suggested books and online materials<br><br><b>P:</b> Nutritionist, clinical psychologist                                                                               | IG2, pre-post: -0.06 (0.029)*<br>Pre-FU: -0.08 (0.03)*                                                         | ↓ |  |
| de Carvalho-Ferreira et al. 2015 <sup>9</sup> ; Brazil; pre-post; outpatient; neutral | n=75, 60% F<br><br>13-19y, 16.28 (2.37)y<br><br>BMI $\geq$ 95th percentile<br>BMI z-score 2.21 (0.27)          | 12 mo<br><br>Weekly nutrition and psychological groups + 3x1 hr supervised exercise classes/wk; individual nutrition consult 1/mo<br><br>Nil follow-up<br><br><b>R:</b> 100% | <b>IG:</b> nutrition education, energy intake set at recommended levels based on dietary reference intake for participants with low levels of PA by age and gender; supervised aerobic and resistance exercise training, 30 min/session; psychological group to discuss skills to manage emotional issues associated with obesity, for example binge eating, bulimia nervosa, depression, anxiety, body image; individual psychological consultations for those with greater need.<br><br><b>P:</b> Multidisciplinary team | <b>BMI z-score</b><br>Pre-post: -0.38 (0.034)*<br><br><b>BMI</b><br>Pre-post: -4.04 (0.40) kg/m <sup>2</sup> * | ↓ |  |
| Edwards et al. 2006 <sup>10</sup> ; UK; pre-post; tertiary outpatient; neutral        | n=33, 70% F<br><br>8-13y, 10.1 (1.6)y<br><br>BMI $\geq$ 98 <sup>th</sup> percentile<br>BMI z-score 3.23 (0.48) | 4 mo<br><br>1.5 hr group sessions, 8 weekly then 4 biweekly sessions                                                                                                         | <b>IG:</b> FBT with concurrent parent and child group sessions; nutrition education based on the TLD; PA education, increase to 60 mins/d; behaviour modification techniques including self-monitoring, goal setting, stimulus control. Parent education in                                                                                                                                                                                                                                                                | <b>BMI z-score</b><br>Pre-post: -0.15 (0.08)*<br><br>Maintained at follow-up<br>p<0.001 (data NR)              | ↓ |  |

|                                                                                                                                              |                                                                                                                           |                                                                                                                                                            |                                                                                                                                                                                                                                                                                                                                                                                                                                                                                                                                                                  |                                                          |  |   |
|----------------------------------------------------------------------------------------------------------------------------------------------|---------------------------------------------------------------------------------------------------------------------------|------------------------------------------------------------------------------------------------------------------------------------------------------------|------------------------------------------------------------------------------------------------------------------------------------------------------------------------------------------------------------------------------------------------------------------------------------------------------------------------------------------------------------------------------------------------------------------------------------------------------------------------------------------------------------------------------------------------------------------|----------------------------------------------------------|--|---|
|                                                                                                                                              |                                                                                                                           | Follow-up 7 mo from baseline<br><br><b>R:</b> 82% at 4mo; 61% at 7 mo                                                                                      | behaviour management to support behaviour change for the child<br><br><b>P:</b> NR                                                                                                                                                                                                                                                                                                                                                                                                                                                                               |                                                          |  |   |
| Fenner et al. 2016 <sup>11</sup> ;<br>Curtin University's Activity, Food, and Attitudes Program (CAFAP); Australia; NRCT; community; neutral | n=68, %F NR<br><br>11-16y, 3.9 (1.5)y<br><br>BMI > 85 <sup>th</sup> percentile<br>BMI z-score 2.1 (0.3)                   | 8 wk<br><br>2 hr session twice/wk (1 hr adolescent PA, 1 hr parent education, 1 hr joint group)<br><br>Follow-up 12-mon from baseline<br><br><b>R:</b> 82% | <b>IG:</b> circuit training exercise class; parent only education on supporting the adolescent e.g. goal setting and parenting styles. Joint parent and adolescent education included topics such as setting goals, nutrition principles, behaviour change, barriers, problem solving, and family cohesion<br><br><b>CG:</b> Participants as own control during the pre-intervention period<br><br><b>P:</b> Multidisciplinary team                                                                                                                              | No significant change in BMI z-score (data not reported) |  | ↓ |
| Fennig et al. 2015 <sup>12</sup> ;<br>Israel; pre-post; inpatient + outpatient; neutral                                                      | n=17, 67% F<br><br>8-17y, 14.47 (2.61)y<br><br>BMI>40 with complications or BMI>50<br>BMI 44.79 (10.27) kg/m <sup>2</sup> | 12 wk<br><br>4-wk hospital admission, then hospital visits 2 d/wk for 8 wk<br><br>Nil follow-up<br><br><b>R:</b> 88%                                       | <b>Hospital intervention:</b> calorie restriction 1400-1600 kcal/d, family intervention, behavioural and cognitive therapy, PA education<br><b>Post-hospital:</b> Individual daily menu (1400-1600 kcal/d, 3 meals, 3 snacks); individual PA plan, biweekly exercise classes; CBT 2d/wk, including regular weighing, self-monitoring, addressing self-evaluation of body shape, weight and eating habits<br><b>Family intervention:</b> weekly parent education with dietitian and in a group to address behaviour change to facilitate and maintain weight loss | <b>BMI</b><br>Pre-post: -3.15 (2.05) kg/m <sup>2</sup> * |  | - |

|                                                                                                                                                            |                                                                                                                                                                                                                                                                                   |                                                                                                                                                                                                                                                                       |                                                                                                                                                                                                                                                                                                                                                                                                                                                                          |                                                           |     |  |
|------------------------------------------------------------------------------------------------------------------------------------------------------------|-----------------------------------------------------------------------------------------------------------------------------------------------------------------------------------------------------------------------------------------------------------------------------------|-----------------------------------------------------------------------------------------------------------------------------------------------------------------------------------------------------------------------------------------------------------------------|--------------------------------------------------------------------------------------------------------------------------------------------------------------------------------------------------------------------------------------------------------------------------------------------------------------------------------------------------------------------------------------------------------------------------------------------------------------------------|-----------------------------------------------------------|-----|--|
|                                                                                                                                                            |                                                                                                                                                                                                                                                                                   |                                                                                                                                                                                                                                                                       | <b>P:</b> Dietitian, therapist                                                                                                                                                                                                                                                                                                                                                                                                                                           |                                                           |     |  |
| Fonseca et al. 2014 <sup>13</sup> ;<br>Portugal; pre-post;<br>camp; neutral                                                                                | n=28, 54% F<br><br>>12y, 13.3 (1.7)y<br><br>BMI > 95 <sup>th</sup> percentile<br>BMI 30.2 (5.4) kg/m <sup>2</sup>                                                                                                                                                                 | 2 wk<br><br>Follow-up 6 mon from<br>baseline (data not<br>reported)<br><br><b>R:</b> 100%                                                                                                                                                                             | <b>IG:</b> Diet of 1800 kcal/day, 6 meals planned<br>by nutritionists and based on dietary<br>guidelines; nutrition/cooking classes;<br>structured PA of 120 mins/day;<br>psychoeducation sessions focused on<br>increasing motivation and addressed<br>topics including body image, self-esteem,<br>physical appearance, stigma<br><br><b>P:</b> Multidisciplinary team                                                                                                 | <b>BMI</b><br>Pre-post: -0.60 (0.75)<br>kg/m <sup>2</sup> | ↓   |  |
| Goldfield et al. 2015 <sup>14</sup> ;<br>Healthy Eating<br>Aerobic and<br>Resistance Training in<br>Youth (HEARTY);<br>Canada; RCT;<br>community; positive | n=304 (IG1 75, IG2 78,<br>IG3 75, IG4 76), 70% F<br><br>14-18y, 15.6 (1.4)y<br><br>BMI ≥ 95 <sup>th</sup> percentile<br>BMI IG1 34.6 (4.2)<br>kg/m <sup>2</sup> , IG2 35.1 (4.6)<br>kg/m <sup>2</sup> , IG3 34.6 (4.2)<br>kg/m <sup>2</sup> , IG4 34.1 (4.9)<br>kg/m <sup>2</sup> | 6 mon<br><br>4 wk run-in period, then<br>4 sessions/wk<br>(increasing from 20 to 45<br>min) for 22 wk; dietitian<br>visit at baseline, 3 and 6<br>mon, phone support at 6<br>wk and 4 mon<br><br>Nil follow-up<br><br><b>R:</b> IG1 76%, IG2 73%,<br>IG3 77%, IG4 75% | All participants received counselling by a<br>dietitian to promote healthy diet with an<br>energy deficit of 250 kcal/d, and nutrition<br>education.<br><br><b>IG 1:</b> aerobic exercise, 60-85% max heart<br>rate<br><b>IG 2:</b> resistance training with weights,<br>increasing duration and intensity<br><b>IG 3:</b> Combination of aerobic and<br>resistance training<br><b>IG4:</b> nutrition only; no PA component<br><br><b>P:</b> Dietitian, personal trainer | Not reported                                              | -/↓ |  |
| Goossens et al.<br>2011 <sup>15</sup> ; Belgium; pre-<br>post; inpatient; neutral                                                                          | n=108, 68% F<br><br>10-17y, 13.06 (1.99)y<br><br>BMI >95 <sup>th</sup> percentile<br>BMI 31.9 (4.43) kg/m <sup>2</sup>                                                                                                                                                            | 10 mo<br><br>Inpatient program<br><br>Follow-up 6y from<br>baseline                                                                                                                                                                                                   | <b>IG:</b> 'non-diet' healthy lifestyle program;<br>1400-1600 kcal/d energy intake, 3 meals<br>and 2 snacks; structured PA, 4 hr/wk<br>individualised program and 10 hr/wk<br>organised sport; small group CBT program<br>for 12 wk including self-regulation, self-<br>evaluation, self-reward, and development                                                                                                                                                         | <b>BMI</b><br>Pre-FU: -0.36 (0.48) kg/m <sup>2</sup>      | -   |  |



|                                                                                                                                                       |                                                                                                                      |                                                                                                                                                                      |                                                                                                                                                                                                                                                                                                           |                                                                                                              |   |   |
|-------------------------------------------------------------------------------------------------------------------------------------------------------|----------------------------------------------------------------------------------------------------------------------|----------------------------------------------------------------------------------------------------------------------------------------------------------------------|-----------------------------------------------------------------------------------------------------------------------------------------------------------------------------------------------------------------------------------------------------------------------------------------------------------|--------------------------------------------------------------------------------------------------------------|---|---|
|                                                                                                                                                       |                                                                                                                      | <b>R:</b> 52% at 6y                                                                                                                                                  | of a personal plan. Parents education biweekly, on preparing healthy food, shopping and aerobic exercises<br><br><b>P:</b> Multidisciplinary team                                                                                                                                                         |                                                                                                              |   |   |
| Gunnarsdottir et al. 2012 <sup>16</sup> ; Iceland; pre-post; community; neutral                                                                       | n=61, 45% F<br>7.5-13.6y, 11 (1.4)y<br><br>Clinical sample of children with obesity (IOTF)<br>BMI z-score 3.11 (0.5) | 18 wk<br><br>12 sessions, child/parent dyads, 1 x individual counselling (20 min) + 1 x group (60-90 min)<br><br>Follow-up 15 mon from baseline<br><br><b>R:</b> 73% | <b>IG:</b> nutrition education, TLD; PA education aiming for 30 min of activity 6 d/wk; group behavioural therapy using standardised treatment manuals<br><br><b>P:</b> Multidisciplinary team                                                                                                            | <b>BMI z-score</b><br>Pre-post: -0.39 (0.05)*<br><br>Pre-FU: -0.35 (0.05)*                                   | ↓ | ↓ |
| Jacobson 2009 <sup>17</sup> and Jacobson et al. 2012 <sup>18</sup> ; Healthy Choices Intervention (HCI) Program; USA; pre-post; primary care; neutral | n=17, 65% F<br>9-12y, 129.03 (15.19)mon<br>BMI ≥ 85 <sup>th</sup> percentile<br>BMI z-score 1.91 (0.42)              | 7-13 wk, 9.45 (2.2) wk<br><br>4 clinic sessions (30-60 min) + 3 telephone sessions (30-45 min)<br><br>Nil follow-up<br><br><b>R:</b> 88%                             | <b>IG:</b> nutrition education; PA education, use of pedometer; CBT based behaviour component including goal setting, self-esteem, response to stress, coping techniques<br><br><b>P:</b> NR                                                                                                              | <b>BMI z-score</b><br>Pre-post: -0.18 (0.087)*<br><br><b>BMI</b><br>Pre-post: -1.01 (0.65) kg/m <sup>2</sup> | - | - |
| Kelly et al. 2011 <sup>19</sup> ; Teaching, Encouragements, Exercise, Nutrition and Support (TEENS); USA; pre-post; community; neutral                | n=98, 68% F<br>11-18y, 13.66 (1.83)y<br><br>BMI >95 <sup>th</sup> percentile<br>BMI percentile 99.28 (0.54)          | 6 mon<br><br>Weekly exercise classes + biweekly dietitian and behavioural specialist (alternating parent and adolescent) visits; 70% attendance required             | <b>IG:</b> parent and adolescent dyads; nutrition education; exercise class 1 d/wk (60 min) plus requirement to complete 2 d/wk and record in diary; either support group classes or individual consults based on assessment by behavioural specialist<br><br><b>P:</b> Dietitian, behavioural specialist | <b>BMI</b><br>Pre-post: -0.76 (0.19) lb/in <sup>2</sup> *                                                    | - |   |

|                                                                                             |                                                                                                                                                    |                                                                                                                                                 |                                                                                                                                                                                                                                                                                                                                                                                                                                            |                                                                                                                       |   |  |
|---------------------------------------------------------------------------------------------|----------------------------------------------------------------------------------------------------------------------------------------------------|-------------------------------------------------------------------------------------------------------------------------------------------------|--------------------------------------------------------------------------------------------------------------------------------------------------------------------------------------------------------------------------------------------------------------------------------------------------------------------------------------------------------------------------------------------------------------------------------------------|-----------------------------------------------------------------------------------------------------------------------|---|--|
|                                                                                             |                                                                                                                                                    | <p>Nil follow-up</p> <p><b>R:</b> 33%</p>                                                                                                       |                                                                                                                                                                                                                                                                                                                                                                                                                                            |                                                                                                                       |   |  |
| <p>Kerkar et al. 2013<sup>20</sup>;<br/>UK; NRCT; tertiary<br/>outpatient; neutral</p>      | <p>n=48, % F NR</p> <p>8-17y, 12.27 (2.34)y</p> <p>BMI &gt; 97<sup>th</sup> percentile<br/>with NAFLD</p> <p>BMI 28.95 (4.57) kg/m<sup>2</sup></p> | <p>6 mon</p> <p>Varying number of visits<br/>and duration based on<br/>standard clinical practice</p> <p>Nil follow-up</p> <p><b>R:</b> 69%</p> | <p><b>IG:</b> standard clinical care consistent with<br/>recommendations for NADLF management<br/>including regular visits at the clinic, liver<br/>imaging and biopsy as required; nutrition<br/>education with the option to consult a<br/>nutritionist and endocrinologist to assist<br/>with implementing dietary change; PA<br/>education</p> <p><b>CG:</b> no-treatment control without NAFLD<br/>(data NR)</p> <p><b>P:</b> MDT</p> | <p><b>BMI</b></p> <p>Pre-post: -0.15 (0.61) kg/m<sup>2</sup></p>                                                      | ↓ |  |
| <p>Kotler et al. 2006<sup>21</sup>;<br/>USA; pre-post; tertiary<br/>outpatient; neutral</p> | <p>n=16, 100% F</p> <p>12-15y, 13.2 (1.1)y</p> <p>BMI≥95<sup>th</sup> percentile</p> <p>BMI 36.8 (5.5) kg/m<sup>2</sup></p>                        | <p>6 wk</p> <p>Daily attendance at the<br/>service for adolescents;<br/>weekly parent group</p> <p>Nil follow-up</p> <p><b>R:</b> 100%</p>      | <p><b>IG:</b> program focused on healthy eating and<br/>PA education without explicit focus on<br/>large amounts of weight loss; shopping<br/>and cooking, all meals provided at the<br/>program (no energy prescription reported),<br/>PA provided through trips to recreational<br/>facilities; behavioural therapy group, art<br/>therapy and yoga</p> <p><b>P:</b> NR</p>                                                              | <p>No significant change in<br/>BMI (data NR)</p>                                                                     | ↓ |  |
| <p>Kulik 2012<sup>22</sup>; USA;<br/>RCT; community;<br/>neutral</p>                        | <p>n=41 (IG1 23, IG2 18),<br/>100% F</p> <p>13-17y, 15.2 (1.5)y</p> <p>30-130% overweight</p>                                                      | <p>16 wk</p> <p>1.5 hr group meetings,<br/>weekly for the first<br/>month, biweekly for</p>                                                     | <p><b>IG1</b> and <b>IG2</b> received a CBT based<br/>nutrition education, calorie goal of 1200-<br/>1800 kcal/d based on height and weight;<br/>exercise recommendation to increase<br/>current PA by 15 min, gradually increasing<br/>to at least 60 min/d of moderate to</p>                                                                                                                                                            | <p><b>Change in %overweight</b></p> <p>IG1, Pre-post:<br/>-6.25 (1.51)%*</p> <p>IG2, Pre-post:<br/>-6.57 (1.31)%*</p> | - |  |

|                                                                                              |                                                                                              |                                                                                                            |                                                                                                                                                                                                                                                                                                                                                                                                                                                                                                                                                                                                                                                                                                                                                                     |                                                                                     |   |  |
|----------------------------------------------------------------------------------------------|----------------------------------------------------------------------------------------------|------------------------------------------------------------------------------------------------------------|---------------------------------------------------------------------------------------------------------------------------------------------------------------------------------------------------------------------------------------------------------------------------------------------------------------------------------------------------------------------------------------------------------------------------------------------------------------------------------------------------------------------------------------------------------------------------------------------------------------------------------------------------------------------------------------------------------------------------------------------------------------------|-------------------------------------------------------------------------------------|---|--|
|                                                                                              | <p>mean % overweight IG<br/>64.84 (20.0)%, IG2<br/>74.67 (28.1)%</p>                         | <p>second mon, monthly for<br/>the last two mon</p> <p>Nil follow-up</p> <p><b>R:</b> IG1 83%, IG2 94%</p> | <p>vigorous; behaviour skills including self-monitoring, goal setting, stimulus control, behavioural substitution, relapse prevention, problem solving, cognitive restructuring</p> <p>Parents/guardian education (3 meetings) on how to manage expectations for the program, how to help their teen in planning meals, helpful and unhelpful parent and family behaviours related to weight loss, and maintenance after the program</p> <p><b>IG1:</b> additional peer social support component, including weight loss support, buddy system, online support chats with participants and support providers</p> <p><b>IG2:</b> education only, limited peer-to-peer interaction</p> <p><b>P:</b> Trained weight loss interventionist, group treatment providers</p> |                                                                                     |   |  |
| <p>Lane-Tillerson et al. 2005<sup>23</sup>; Lifesteps; USA; pre-post; community; neutral</p> | <p>n=31, 100% F</p> <p>13-17y, 15 y (SD NR)</p> <p>Overweight<br/>Weight 90.72kg (SD NR)</p> | <p>5 mon</p> <p>16 x 1.5 hr group sessions</p> <p>Nil follow-up</p> <p><b>R:</b> 58%</p>                   | <p><b>IG:</b> Groups conducted as girls alone, girls with mother, or mothers alone; nutrition education based on a low-calorie diet, using goal setting strategy for dietary monitoring; culturally appropriate freestyle dance sessions; behaviour change focus including goal setting and development of action plan</p> <p><b>P:</b> NR</p>                                                                                                                                                                                                                                                                                                                                                                                                                      | <p><b>BMI</b> significantly reduced between pre-and post-intervention (data NR)</p> | ↓ |  |

|                                                                                             |                                                                                                                                           |                                                                                                                                                                                                                     |                                                                                                                                                                                                                                                                                                                                                                                                                                          |                                                                                                                                          |     |   |
|---------------------------------------------------------------------------------------------|-------------------------------------------------------------------------------------------------------------------------------------------|---------------------------------------------------------------------------------------------------------------------------------------------------------------------------------------------------------------------|------------------------------------------------------------------------------------------------------------------------------------------------------------------------------------------------------------------------------------------------------------------------------------------------------------------------------------------------------------------------------------------------------------------------------------------|------------------------------------------------------------------------------------------------------------------------------------------|-----|---|
| Levine et al. 2001 <sup>24</sup> ;<br>USA; pre-post;<br>community; neutral                  | n=24, 46% F<br><br>8-12y, 10.2 (1.5)y<br><br>>160% of ideal body weight (WHO reference charts)<br>BMI 34.5 (5.2) kg/m <sup>2</sup>        | 10-12 wk<br><br>Weekly group sessions<br><br>Follow-up 7-16 mo from baseline (mean 11 mo)<br><br><b>R:</b> 67% post-intervention; 50% follow-up                                                                     | <b>IG:</b> Behavioural group program; nutrition education of Stoplight Diet, calorie target of 1200-1500kcal/d based on child's initial weight; exercise goals to work towards 30 min/d of activity on 5 d/wk and reduce sedentary behaviours, plus weekly group exercise activity e.g. walk; self-monitoring, portion size control, emotions, teasing and relapse prevention<br><br><b>P:</b> NR                                        | <b>BMI</b><br>Pre-post: -1.70 (1.06) kg/m <sup>2</sup><br><br>No significant change between baseline and follow-up                       | ↓   | ↓ |
| Lochrie et al. 2013 <sup>25</sup> ;<br>USA; RCT; tertiary outpatient; positive              | n=130 (IG 1 65, IG2 65), 63% F<br><br>8-11y, 9.9 (1.1)y<br><br>BMI ≥85 <sup>th</sup> percentile<br>BMI z-score, combined groups 2.2 (0.4) | 6 mon<br><br>IG1: 60-90 min groups - 8 weekly, then 4 bimonthly, then 2 monthly sessions<br><br>IG2: 1 group session<br><br>Follow-up 12 mon from baseline<br><br><b>R:</b> 68% at 6 mo, 55% at 12 mo (NR by group) | <b>IG1:</b> Lifestyle intervention; nutrition education; PA education including benefits of exercise, creative ways to exercise, safe and effective techniques<br><br><b>IG2:</b> usual care control group; typical educational and consultative intervention provided in the specialty clinic; general nutrition and PA education; no behaviour change; list of community resources<br><br><b>P:</b> Dietitian, psychologist (IG1 only) | <b>BMI z-score</b><br>IG1, Pre-post: -0.18 (0.04)*<br>Pre-FU: -0.23 (0.03)*<br><br>IG2, Pre-post: -0.08 (0.04)*<br>Pre-FU: -0.13 (0.03)* | -/↓ |   |
| Lofrano-Prado et al. 2009 <sup>26</sup> ;<br>Brazil; pre-post; tertiary outpatient; neutral | n=66, 62% F<br><br>15-19y, girls 16.56 (1.99)y, boys 16.20 (2.09)y<br><br>BMI>95 <sup>th</sup> percentile                                 | 6 mo<br><br>5 x 1-hr sessions/wk (3 x supervised exercise, 1 nutrition, 1 psychological group sessions) + 1/mo visit with endocrinologist                                                                           | <b>IG:</b> nutrition education, encouraged to follow a balanced diet and reduce food intake; supervised personalised moderate intensity exercise program; psychological group sessions to discuss body image, eating disorders, food and feelings, individual therapy when problems identified                                                                                                                                           | <b>BMI</b><br>Girls, pre-post: -2.94 (0.66) kg/m <sup>2</sup> *<br>Boys, pre-post: -3.74 (0.88) kg/m <sup>2</sup> *                      | -/↓ | ↓ |

|                                                                                                                                                                                              |                                                                                                                                                                                                                                                                  |                                                                                                                                                                                                       |                                                                                                                                                                                                                                                                                                                                                                                                                                                                                                                                                   |                                                                                                                                         |  |   |
|----------------------------------------------------------------------------------------------------------------------------------------------------------------------------------------------|------------------------------------------------------------------------------------------------------------------------------------------------------------------------------------------------------------------------------------------------------------------|-------------------------------------------------------------------------------------------------------------------------------------------------------------------------------------------------------|---------------------------------------------------------------------------------------------------------------------------------------------------------------------------------------------------------------------------------------------------------------------------------------------------------------------------------------------------------------------------------------------------------------------------------------------------------------------------------------------------------------------------------------------------|-----------------------------------------------------------------------------------------------------------------------------------------|--|---|
|                                                                                                                                                                                              | BMI girls 35.53 (4.19) kg/m <sup>2</sup> , boys 35.78 (4.25) kg/m <sup>2</sup>                                                                                                                                                                                   | Nil follow-up<br><b>R:</b> 88%                                                                                                                                                                        | <b>P:</b> Multidisciplinary team                                                                                                                                                                                                                                                                                                                                                                                                                                                                                                                  |                                                                                                                                         |  |   |
| Luca et al. 2015 <sup>27</sup> ;<br>Sick Kids Team<br>Obesity Management Program (STOMP);<br>Canada; NRCT;<br>tertiary outpatient;<br>neutral<br><br>(reporting 12 mon data from 2y program) | n=117 (IG 75, CG 42), IG 65% F; CG 59% F<br><br>12-17y, IG 15.1 (1.8)y, CG 14.9 (2.0)y<br><br>BMI ≥ 99 <sup>th</sup> percentile OR BMI >95 <sup>th</sup> percentile with comorbidities<br>BMI IG 44.87 (7.8) kg/m <sup>2</sup> , CG 34.5 (8.0) kg/m <sup>2</sup> | 24 mon<br><br>2-hr session/wk for 6 wk, then 1.5-hr biweekly sessions for 6 mon, individualised follow-up and transition from 12-24 mon<br><br>Nil follow-up<br><br><b>R:</b> IG 80%, CG 83% at 12 mo | <b>IG:</b> Four phases: first stage, intensive nutrition education + cooking sessions, group exercise plus individual sessions if needed, mental health component; second stage, ongoing intervention at decreased frequency; third stage, begins at 12 mon, 1.5 hr session/mon; fourth phase: begins at 18 mon, focus on transition, optional 1.5 hr group/mon, transition to local community services and a small number of participants have bariatric surgery.<br><br><b>CG:</b> non-enrolled control<br><br><b>P:</b> Multidisciplinary team | <b>BMI</b><br>IG, pre-post: 0.8 (0.07) kg/m <sup>2</sup> *<br><br>CG, pre-post: 1.2 (0.07) kg/m <sup>2</sup> *                          |  | ↓ |
| Mellin et al. 1987 <sup>28</sup> ;<br>Shapedown; USA;<br>RCT; community;<br>neutral                                                                                                          | n=63 (IG 37, CG 29), IG 81% F, CG 76% F<br><br>IG 12-18y, 15.6y; CG 14-18y, 15.6y (SD NR)<br><br>Weight, mean (range) IG 79.2 (58.05-134.55) kg, CG 76.95 (59.4-121.95) kg                                                                                       | 14 wk<br><br>Weekly 90 min group; two parent sessions<br><br>Follow-up 15 mon from baseline<br><br><b>R:</b> IG 92%, CG 100% at 14 wk and 15 mon                                                      | <b>IG:</b> self-directed change format aiming for small sustainable change; nutrition education; weekly exercise as part of group sessions; cognitive, behavioural, affective and interactional techniques adapted to adolescents; parent education on how to support the adolescent, family diet and activity, communication<br><br><b>CG:</b> no treatment control<br><br><b>P:</b> Dietitian, nutritionist                                                                                                                                     | <b>Weight</b><br>IG, pre-post: -5.9 (1.16) kg*<br>Pre-FU: -9.9 (2.46) kg*<br><br>CG, pre-post: -0.3 (1.23) kg<br>Pre-FU: -0.1 (2.45) kg |  | ↓ |

|                                                                                                                                                                   |                                                                                                                                                                                                             |                                                                                                                               |                                                                                                                                                                                                                                                                                                                                                                                                                                                                                                                                                                                                                                  |                                                                                           |   |   |
|-------------------------------------------------------------------------------------------------------------------------------------------------------------------|-------------------------------------------------------------------------------------------------------------------------------------------------------------------------------------------------------------|-------------------------------------------------------------------------------------------------------------------------------|----------------------------------------------------------------------------------------------------------------------------------------------------------------------------------------------------------------------------------------------------------------------------------------------------------------------------------------------------------------------------------------------------------------------------------------------------------------------------------------------------------------------------------------------------------------------------------------------------------------------------------|-------------------------------------------------------------------------------------------|---|---|
| Moon at al. 2004 <sup>29</sup> ;<br>Korea; NRCT; school;<br>neutral                                                                                               | n=69 (IG 41, CG 28),<br>39% F<br><br>4 <sup>th</sup> -6 <sup>th</sup> grade elementary<br>school aged, mean age<br>NR<br>>20% degree of obesity<br>BMI NR                                                   | 8 wk<br><br>60-70 min group/wk<br><br>Nil follow-up<br><br><b>R:</b> IG 83%, CG 100%                                          | <b>IG:</b> behaviour modification program;<br>nutrition education, eating habits; PA<br>education; behaviour modification including<br>self-monitoring, stimulus control, social<br>support, changing perception,<br>development of long term plan<br><br><b>CG:</b> no treatment control<br><br><b>P:</b> School nurse                                                                                                                                                                                                                                                                                                          | <b>Body fat %</b><br>IG, pre-post: -0.4 (0.78)%<br>CG, pre-post: 4.0 (0.91)%              | - |   |
| Munsch et al. 2008 <sup>30</sup> ;<br>Training of obese<br>children and their<br>parents (TAKE<br>program); Switzerland;<br>RCT; tertiary<br>outpatient; positive | n=56 (IG1 31, IG2 25),<br>60% F<br><br>8-12y, IG1 10.3 (1.4)y,<br>IG2 10.6 (1.5)y<br><br>BMI > 85 <sup>th</sup> percentile<br>BMI IG1 26.5 (3.3)<br>kg/m <sup>2</sup> , IG2 28.0 (5.4)<br>kg/m <sup>2</sup> | 40 wk<br><br>10 weekly group<br>sessions, then 6 x<br>monthly sessions<br><br>Nil follow-up<br><br><b>R:</b> IG1 65%, IG2 28% | <b>IG1:</b> Mother-Child CBT treatment<br><br><b>IG2:</b> Mother only CBT treatment, children<br>attended relaxation training<br><br><b>CBT treatment:</b> nutrition education using<br>the Stoplight Diet, encouraged to follow<br>three rules: 1) any food on the table may<br>be eaten by all family members, 2) offer<br>restricted amounts of high fat foods, 3)<br>offer sufficient amount of low-fat foods so<br>child can eat until satiated; modelling of PA<br>by mothers; behavioural intervention<br>including self-monitoring, motivation, goal<br>achievement, relapse prevention<br><br><b>P:</b> Psychotherapist | <b>% overweight (SD NR)</b><br>IG1: pre 56.76, post 54.85*<br>IG2: pre 65.09, post 60.57* | ↓ | ↓ |
| Murdoch et al. 2011 <sup>31</sup> ;<br>UK; pre-post;<br>community; neutral                                                                                        | n=17, 53% F<br><br>7.5-14y, 10.5 (1.82)y<br><br>BMI>98 <sup>th</sup> percentile<br>BMI z-score 3.16 (0.56)                                                                                                  | 6 mon<br><br>1.5 hr group sessions,<br>10 weekly then 5<br>biweekly                                                           | <b>IG:</b> Children attend group with one parent;<br>nutrition education based on TLD; PA<br>education, encourage 60 min/d and<br>reduced sedentary time; behavioural<br>therapy including self-monitoring, goal<br>setting, positive reinforcement, stimulus                                                                                                                                                                                                                                                                                                                                                                    | <b>BMI z-score</b><br>Pre-post: -0.06 (0.10)                                              | ↓ |   |

|                                                                                                                                                |                                                                                                                                                                                                            |                                                                                                                                                                                                                                                                                                                                           |                                                                                                                                                                                                                                                                                                                                                                                                                                                                                            |                                                                                                                                                                                                                                                                |  |                   |
|------------------------------------------------------------------------------------------------------------------------------------------------|------------------------------------------------------------------------------------------------------------------------------------------------------------------------------------------------------------|-------------------------------------------------------------------------------------------------------------------------------------------------------------------------------------------------------------------------------------------------------------------------------------------------------------------------------------------|--------------------------------------------------------------------------------------------------------------------------------------------------------------------------------------------------------------------------------------------------------------------------------------------------------------------------------------------------------------------------------------------------------------------------------------------------------------------------------------------|----------------------------------------------------------------------------------------------------------------------------------------------------------------------------------------------------------------------------------------------------------------|--|-------------------|
|                                                                                                                                                |                                                                                                                                                                                                            | <p>Nil follow-up</p> <p><b>R:</b> 61%</p>                                                                                                                                                                                                                                                                                                 | <p>control, teasing, problem-solving; parent education on supporting the child</p> <p><b>P:</b> Dietitian, psychologist</p>                                                                                                                                                                                                                                                                                                                                                                |                                                                                                                                                                                                                                                                |  |                   |
| <p>Nobles et al. 2016<sup>32</sup>; Self, Help, Independence, Nutrition and Exercise (SHINE); UK; retrospective review; community; neutral</p> | <p>n=435, 49% F</p> <p>10-17y, 12.9 (2.0)y</p> <p>Severe obesity (BMI z-score <math>\geq</math> 2.67) or obesity (BMI z-score <math>\geq</math> 2.00) with comorbidities</p> <p>BMI z-score 3.13 (0.5)</p> | <p>Up to 15 mon</p> <p><b>Phase 1</b>, 1x 1-1.5 hr individual session</p> <p><b>Phase 2</b> 2 hr group session/wk for 3 mon</p> <p><b>Phase 3</b> (optional maintenance phase), 3 x 12 wk modules with 1 hr group/wk</p> <p>Nil follow-up, families have the option to access the service until the child is 18y</p> <p><b>R:</b> 76%</p> | <p><b>IG:</b> nutrition education; group PA sessions run throughout the week using local facilities, 7 hr/wk of optional activities available; behavioural modification including CBT, satiety, self-control and stress management, optional one-on-one counselling sessions if required</p> <p><b>P:</b> Trained postgraduate students, senior experienced members of staff</p> <p>Depression and anxiety measured at baseline and 3 months only in a subsample of the cohort (n=168)</p> | <p><b>BMI z-score</b></p> <p>Pre-post: -0.27 (0.02)*</p> <p><b>BMI</b></p> <p>Pre-post: -1.67 (0.16) kg/m<sup>2</sup>*</p>                                                                                                                                     |  | <p>↓</p> <p>↓</p> |
| <p>Panagiotopoulos et al. 2011<sup>33</sup>; Centre for Healthy Weights-Shapedown BC (CHW-SB); Canada; NRCT; tertiary outpatient; neutral</p>  | <p>n=119, 43% F</p> <p>6-17y, 11.6 (2.6)y</p> <p>BMI <math>\geq</math> 95<sup>th</sup> percentile or <math>\geq</math> 85<sup>th</sup> percentile with comorbidity</p> <p>BMI z-score 2.26 (0.33)</p>      | <p>10 wk</p> <p>2 hr group session/wk</p> <p>Nil follow-up</p> <p><b>R:</b> 71%</p>                                                                                                                                                                                                                                                       | <p><b>IG:</b> Parent and participant nutrition education sessions; 30 min/wk exercises session for children, focused on strength, flexibility and endurance; psychology sessions including goal setting communication, appropriate limit-setting and expectations, problem-solving and managing challenges, building self-esteem, developing realistic thinking, and dealing with teasing/bullying.</p>                                                                                    | <p><b>BMI z-score</b> (NR pre-program)</p> <p>Pre-post: -0.06 (0.029)*</p> <p><b>Weight trajectory</b></p> <p>Control period: 0.89% (95%CI 0.69 to 1.09) monthly increase in weight</p> <p>Intervention period: 0.37% (95%CI 0.17 to 0.58) monthly decline</p> |  | <p>-</p> <p>↓</p> |

|                                                                                                |                                                                                                                                                                                 |                                                                                                                                                                                                                     |                                                                                                                                                                                                                                                                                 |                                                                                                                            |   |  |
|------------------------------------------------------------------------------------------------|---------------------------------------------------------------------------------------------------------------------------------------------------------------------------------|---------------------------------------------------------------------------------------------------------------------------------------------------------------------------------------------------------------------|---------------------------------------------------------------------------------------------------------------------------------------------------------------------------------------------------------------------------------------------------------------------------------|----------------------------------------------------------------------------------------------------------------------------|---|--|
|                                                                                                |                                                                                                                                                                                 |                                                                                                                                                                                                                     | <p><b>CG:</b> participants used as own controls prior to program commencement</p> <p><b>P:</b> Multidisciplinary team</p>                                                                                                                                                       |                                                                                                                            |   |  |
| Pathmasiri et al. 2012 <sup>34</sup> ; Take Off 4-Health (TO4-H); USA; pre-post; camp; neutral | <p>n=19, 68% F</p> <p>12-18y, mean age NR</p> <p>BMI ≥ 95<sup>th</sup> percentile</p> <p>BMI z-score 2.43 (0.37)</p>                                                            | <p>3 wk</p> <p>Daily nutrition and PA sessions, behavioural groups twice/wk</p> <p>Nil follow-up</p> <p><b>R:</b> 100%</p>                                                                                          | <p><b>IG:</b> nutrition education groups and individualised energy target, able to self-select meals from options provided; PA education and 2-4 hr/d of fun structured PA e.g. walking, swimming; group and individual CBT</p> <p><b>P:</b> Multidisciplinary team</p>         | <p><b>BMI z-score</b></p> <p>Pre-post: -0.05 (0.07)*</p> <p><b>BMI</b></p> <p>Pre-post: -0.92 (1.77) kg/m<sup>2</sup>*</p> | - |  |
| Pott et al. 2010 <sup>35</sup> ; Fit Kids; Germany; pre-post; tertiary outpatient; neutral     | <p>n=136, 54% F</p> <p>7-15y, 11.5 (1.85)y</p> <p>BMI &gt;97<sup>th</sup> percentile or BMI &gt; 90<sup>th</sup> percentile with comorbidity</p> <p>BMI z-score 2.46 (0.43)</p> | <p>12 mon</p> <p>Phase 1 (3 mon): 3 hr session/wk (90 min education, 90 min exercise)</p> <p>Phase 2 (4-12 mon): 90 min exercise session/wk, monthly parent education</p> <p>Nil follow-up</p> <p><b>R:</b> 85%</p> | <p><b>IG:</b> Phase 1; weekly behavioural therapy sessions alternating between a dietary training course and a parent course to facilitate transfer into everyday family life; exercise program</p> <p>Phase 2; exercise program; monthly parent course</p> <p><b>P:</b> NR</p> | <p><b>BMI z-score</b></p> <p>Pre-post: -0.3 (0.31)*</p> <p><b>BMI</b></p> <p>Pre-post: -1.01 (0.19) kg/m<sup>2</sup>*</p>  | ↓ |  |
| Pratt et al. 2013 <sup>36</sup> ; USA; pre-post; tertiary outpatient; neutral                  | <p>n=267, 54% F</p> <p>8-18y, mean age NR</p> <p>Youth referred due to concern about</p>                                                                                        | <p>Median of 170d</p> <p>Three visits at a tertiary outpatient clinic, appointments every 1-3 mon</p>                                                                                                               | <p><b>IG:</b> tertiary outpatient clinic with a multidisciplinary team using an integrated care model coordinated by both medical and mental health providers</p> <p><b>P:</b> Multidisciplinary team</p>                                                                       | <p><b>BMI z-score</b></p> <p>Pre-post: 0.03 (0.04)</p> <p><b>BMI</b></p> <p>Pre-post: 1.1 (1.26) kg/m<sup>2</sup></p>      | ↓ |  |



|                                                                                                                 |                                                                                                         |                                                                                                                                                      |                                                                                                                                                                                                                                                                                                                                                                                                                                         |                                                                                                                                                             |     |   |
|-----------------------------------------------------------------------------------------------------------------|---------------------------------------------------------------------------------------------------------|------------------------------------------------------------------------------------------------------------------------------------------------------|-----------------------------------------------------------------------------------------------------------------------------------------------------------------------------------------------------------------------------------------------------------------------------------------------------------------------------------------------------------------------------------------------------------------------------------------|-------------------------------------------------------------------------------------------------------------------------------------------------------------|-----|---|
|                                                                                                                 | weight and risk of weight-related comorbidities<br>BMI z-score 2.50 (0.34)                              | Nil follow-up<br><b>R:</b> 42% at second visit, 18% at third visit                                                                                   |                                                                                                                                                                                                                                                                                                                                                                                                                                         |                                                                                                                                                             |     |   |
| Quinlan et al. 2009 <sup>37</sup> ;<br>Healthy Kids Camp Inc; USA; pre-post; camp; neutral                      | n=130, 70% F<br>9-18y, 12.8 (1.9)y<br><br>Overweight/obesity<br>BMI z-score 2.2 (0.37)                  | 8 wk, participants attended for mean (SD) 4.3 (1.9) wk<br><br>1 hr/wk group nutrition and behavioural therapy<br><br>Nil follow-up<br><b>R:</b> 100% | <b>IG:</b> nutrition education and cooking classes, calorie target of 1800 kcal/d (400kcal breakfast, 500kcal lunch, 600kcal dinner, 2x150kcal snacks); 5hrs/d supervised PA including cardiovascular, weight-training and sport-specific exercise; behavioural groups on range of topics including self-esteem, body image, emotional eating, teasing, family and peer support<br><br><b>P:</b> Nutritionist, behavioural psychologist | <b>BMI z-score</b><br>Pre-post: -0.23 (0.01)*<br><br><b>BMI</b><br>Pre-post: -2.9 (0.38) kg/m <sup>2</sup> *                                                | -   |   |
| Shomaker et al. 2017 <sup>38</sup> ; USA; RCT; tertiary outpatient; positive (only healthy eating arm included) | n=14, 79% F<br>8-13y, 11.0 (1.0)y<br><br>BMI≥85 <sup>th</sup> percentile<br>BMI z-score 2.0 (0.4)       | 12 wk<br><br>Weekly 45 min individual sessions<br><br>Follow-up 12 mo from baseline<br><br><b>R:</b> 86% at 12 wk; 57% at 12 mo                      | <b>IG:</b> FBT delivered to parent/child dyads; healthy eating principles; exercise and PA education and home options<br><br><b>P:</b> Clinical psychologist, clinical psychology students                                                                                                                                                                                                                                              | <b>BMI</b><br>Pre-post: 7.92 (1.79) kg/m <sup>2</sup> *<br>Pre-FU: 11.92 (2.53)*<br><br><b>BMI z-score</b><br>Pre-post: 0.01 (0.02)<br>Pre-FU: -0.04 (0.05) | -   | - |
| Small et al. 2017 <sup>39</sup> ;<br>USA; RCT; community; positive                                              | n=67 children (IG 33, CG 27), 60% F<br><br>4-8y, 5.58 (1.43)y,<br><br>BMI ≥ 85 <sup>th</sup> percentile | Up to 17 wk<br><br>4 x 20-45 mins sessions, every 3-4 wk to mimic normal paediatric                                                                  | Children in both groups given a group-specific bag of toys to facilitate activities that parents would be encouraged to complete with their child. Before each sessions, parents were provided with age-                                                                                                                                                                                                                                | <b>BMI percentile</b><br>IG, pre-post: -2.98 (0.97)*<br>Pre-FU: -1.59 (0.62)*<br><br>CG, pre-post: -0.66 (0.97)                                             | ↓/- | - |

|                                                                                 |                                                                                                                |                                                                                                                                                               |                                                                                                                                                                                                                                                                                                                                                                                                                                                                                                                                                                                                                                                |                                                         |   |  |
|---------------------------------------------------------------------------------|----------------------------------------------------------------------------------------------------------------|---------------------------------------------------------------------------------------------------------------------------------------------------------------|------------------------------------------------------------------------------------------------------------------------------------------------------------------------------------------------------------------------------------------------------------------------------------------------------------------------------------------------------------------------------------------------------------------------------------------------------------------------------------------------------------------------------------------------------------------------------------------------------------------------------------------------|---------------------------------------------------------|---|--|
|                                                                                 | BMI percentile IG 96.72 (4.02), CG 95.40 (4.55)                                                                | counselling visits, phone calls between visits<br><br>Follow-up 16 mon from baseline<br><br><b>R:</b> data collected for 90% (NR by group)                    | appropriate, audiotaped, educational information on a range of topics<br><br><b>IG:</b> CBT, healthy lifestyle skill building intervention; nutrition education including healthy habits in young children; increasing PA and decreasing sedentary time; goal setting, motivational support, and skill-building<br><br><b>CG:</b> no lifestyle intervention provided; age-specific health and safety parent education intervention (e.g., thermal injuries, first-aid, insect bites and stings)<br><br><b>P:</b> trained interventionists                                                                                                      | Pre-FU: -0.66 (0.83)                                    |   |  |
| Sothorn et al. 1999 <sup>40</sup> ; USA; pre-post; tertiary outpatient; neutral | n=87, 55% F<br><br>7-17y, mean age NR<br><br>≥ 120% of ideal body weight<br>BMI 33.34 (7.46) kg/m <sup>2</sup> | 12 mon<br><br>Intensive phase: 2 hr visit/wk for 10-20 wk<br><br>Maintenance phase: up to 1y from baseline<br><br>Nil follow-up<br><br><b>R:</b> 100% at 10wk | <b>Intensive phase:</b> including protein-sparing modified fast (PSMF) diet, 800 kcal/d (protein up to 100g/d, carbohydrate limited to 20-25g/d); home-based exercise video and 30-45 min moderate intensity exercise during the weekly intervention for participants and family members; behaviour modification including self-monitoring, cue elimination, stimulus control, symptom substitution, cognitive restructuring and goal setting<br><br><b>Maintenance phase:</b> maintenance program was prescribed once the next lower level or phase of obesity was achieved (not described)<br><br><b>P:</b> Therapist, exercise physiologist | <b>BMI</b><br>Pre-post: -5.00 (0.61) kg/m <sup>2*</sup> | ↓ |  |

|                                                                                                                                       |                                                                                                                                                                                                                                                                  |                                                                                                                                                                                        |                                                                                                                                                                                                                                                                                                                                                                                                                   |                                                                                                                                                                                                                                          |     |     |
|---------------------------------------------------------------------------------------------------------------------------------------|------------------------------------------------------------------------------------------------------------------------------------------------------------------------------------------------------------------------------------------------------------------|----------------------------------------------------------------------------------------------------------------------------------------------------------------------------------------|-------------------------------------------------------------------------------------------------------------------------------------------------------------------------------------------------------------------------------------------------------------------------------------------------------------------------------------------------------------------------------------------------------------------|------------------------------------------------------------------------------------------------------------------------------------------------------------------------------------------------------------------------------------------|-----|-----|
| Stella et al. 2005 <sup>41</sup> ;<br>Brazil; NRCT;<br>community; negative                                                            | n=40 (10 in each group),<br>100% F<br><br>14-19y, 16.0 (1.56)y<br><br>BMI ≥ 95th percentile<br>BMI IG 1 36.8 (4.1)<br>kg/m <sup>2</sup> , IG 2 34.38 (4.81)<br>kg/m <sup>2</sup> , IG 3 35.64 (4.78)<br>kg/m <sup>2</sup> , CG 33.52 (2.72)<br>kg/m <sup>2</sup> | 12 wk<br><br>All groups: weekly<br>nutrition review<br>IG1 & IG2: 3 x 40-60 min<br>exercise sessions/wk<br>IG3: 60 min exercise<br>session/wk<br><br>Nil follow-up<br><br><b>R:</b> NR | <b>All groups:</b> weekly review with nutritionist<br><b>IG1:</b> aerobic exercise on ergonomic<br>bicycle with increasing intensity<br><b>IG2:</b> anaerobic exercise- interval training<br>with increasing intensity<br><b>IG3:</b> leisure activities including games and<br>exercises at sports centre<br><b>IG4:</b> no exercise intervention, nutrition only<br><br><b>P:</b> Nutritionist                  | <b>BMI</b><br>IG1, pre-post:<br>-1.10 (1.05) kg/m <sup>2</sup><br><br>IG2, pre-post:<br>-1.13 (1.17) kg/m <sup>2</sup><br><br>IG3, pre-post:<br>-1.52 (1.17) kg/m <sup>2</sup><br><br>IG4, pre-post:<br>-1.86 (0.62) kg/m <sup>2</sup> * | ↓/- | -/↓ |
| Toulabi et al. 2012 <sup>42</sup> ;<br>The “behavior<br>modification”<br>interventional<br>program; Iran; RCT;<br>community; positive | n=152 (IG 76, CG 76),<br>%F NR<br><br>14-19y, 15.87 (1.0)y<br><br>BMI ≥ 28 if 15y, BMI ≥<br>29 if 16-17y<br>BMI IG 30.43 (2.39)<br>kg/m <sup>2</sup> , CG 30.33 (1.93)<br>kg/m <sup>2</sup>                                                                      | 6 wk<br><br>Weekly parent<br>education; twice/wk<br>student education; 45<br>min exercise classes 3<br>d/wk<br><br>Nil follow-up<br><br><b>R:</b> only completers<br>reported          | <b>IG:</b> face-to-face nutritional education for<br>parents supported by an educational<br>booklet; face-to-face nutritional education<br>for students regarding dietary modification<br>and increasing PA supported by an<br>educational booklet; group exercise<br>classes, aerobic exercise and strength<br>training<br><br><b>CG:</b> no treatment control<br><br><b>P:</b> Nurse, physical education expert | <b>BMI</b><br>IG, pre-post:<br>-2.92 (0.26) kg/m <sup>2</sup> *<br><br>CG, pre-post:<br>-1.18 (0.22) kg/m <sup>2</sup> *                                                                                                                 | ↓   |     |
| Van Vlierberghe et al.<br>2009 <sup>43</sup> ; Belgium; pre-<br>post; inpatient; neutral                                              | n=76, 67% F<br>(subsample of 39<br>completed ED related<br>outcomes)<br><br>14-18y, 15.11 (1.15)y,<br>subsample 15.23<br>(1.23)y                                                                                                                                 | 10 mo<br><br>Nil follow-up<br><br><b>R:</b> 87% whole group,<br>79% subsample                                                                                                          | <b>IG:</b> ‘non-diet’ healthy lifestyle program;<br>1400-1600 kcal/d energy intake, 3 meals<br>and 2 snacks; structured PA, 4 hr/wk<br>individualised program and 10 hr/wk<br>organised sport; small group CBT program<br>for 12 wk including self-regulation, self-<br>evaluation, self-reward, and development<br>of a personal plan. Parents education                                                         | <b>Mean percentage weight<br/>loss</b><br>Pre-post: 52.5 (2.09)%<br>(range 18.2 to 107.4%)                                                                                                                                               | ↓   | ↓   |

|                                                                                                                                                                                       |                                                                                                                                              |                                                                                                                |                                                                                                                                                                                                                                                                                                                                                                                                                      |                                                                                                                                                   |   |
|---------------------------------------------------------------------------------------------------------------------------------------------------------------------------------------|----------------------------------------------------------------------------------------------------------------------------------------------|----------------------------------------------------------------------------------------------------------------|----------------------------------------------------------------------------------------------------------------------------------------------------------------------------------------------------------------------------------------------------------------------------------------------------------------------------------------------------------------------------------------------------------------------|---------------------------------------------------------------------------------------------------------------------------------------------------|---|
|                                                                                                                                                                                       | BMI ≥ 95 <sup>th</sup> percentile<br>BMI z-score 2.25 (0.28)                                                                                 |                                                                                                                | biweekly, on preparing healthy food, shopping and aerobic exercises<br><br><b>P:</b> Paediatrician, therapist                                                                                                                                                                                                                                                                                                        |                                                                                                                                                   |   |
| Wadden et al. 1990 <sup>44</sup> ; WRAP (Weight Reduction and Pride program); USA; RCT; tertiary outpatient; neutral                                                                  | n=36 (IG 1 19, IG2 14, IG3 14), 100% F<br><br>12-16y, 14 years (SD NR)<br><br>At least 10kg overweight<br>BMI 35.2 kg/m <sup>2</sup> (SD NR) | 16 wk<br><br>1 hr sessions/wk<br><br>Follow-up 6 mon from baseline<br><br><b>R:</b> IG 1 84%, IG2 71%, IG3 71% | All children received the same treatment with the exception of parental involvement; nutrition education including with calorie intake of 1000-1500 kcal/d; increased PA; reward system, addressed modifying self-defeating thoughts concerning weight and food<br><br><b>IG 1:</b> Child alone<br><b>IG 2:</b> Mother-child together<br><b>IG 3:</b> Mother-child separately<br><br><b>P:</b> Clinical psychologist | <b>BMI</b><br>Combined groups<br>Pre-post: -1.30 (0.36) kg/m <sup>2</sup> *<br><br>No significant change between baseline and follow-up (data NR) | ↓ |
| Weintraub et al. 2008 <sup>45</sup> ; The Stanford Sports to Prevent Obesity Randomized Trial (SPORT); USA; RCT; school; neutral (Only the health education group included in review) | n=12, %F NR<br><br>Age range NR, 10.34 (0.84)y<br><br>BMI ≥ 85 <sup>th</sup> percentile<br>BMI z-score 2.22 (0.33)                           | 6 mon<br><br>Weekly group sessions<br><br>Nil follow-up<br><br><b>R:</b> 100%                                  | <b>IG:</b> nutrition and health education intervention consisting of weekly after-school meetings<br><br><b>P:</b> Undergraduate and medical students                                                                                                                                                                                                                                                                | <b>BMI z-score</b><br>Pre-post: 0.00 (0.07) kg/m <sup>2</sup><br><br><b>BMI</b><br>Pre-post: 0.79 (1.08) kg/m <sup>2</sup>                        | - |

Abbreviations: CG, control group; F, female; FBT, Family-based treatment; FU, follow-up; IG, intervention group; IOTF, International Obesity Task Force; NAFLD, non-alcoholic fatty liver disease; NR, not reported; NRCT, non-randomised controlled trial; PA, physical activity; pre-post, non-controlled trial; RCT, randomised-controlled trial; TLD, traffic light diet  
\*Change from baseline, P<0.05

↓, statistically significant reduction in symptoms of depression or anxiety between pre- and post-intervention  
↑, statistically significant increase in symptoms of depression or anxiety between pre- and post-intervention  
-, no statistically significant change in symptoms of depression or anxiety between pre- and post-intervention

**eFigure 1.** Meta-regression of the effect size for change in symptoms of depression between pre- and post-intervention and mean participant BMI z-score at baseline following professionally administered obesity treatment with a dietary component in children and adolescents with overweight and obesity ( $R^2=0.18$ ,  $p=0.02$ )

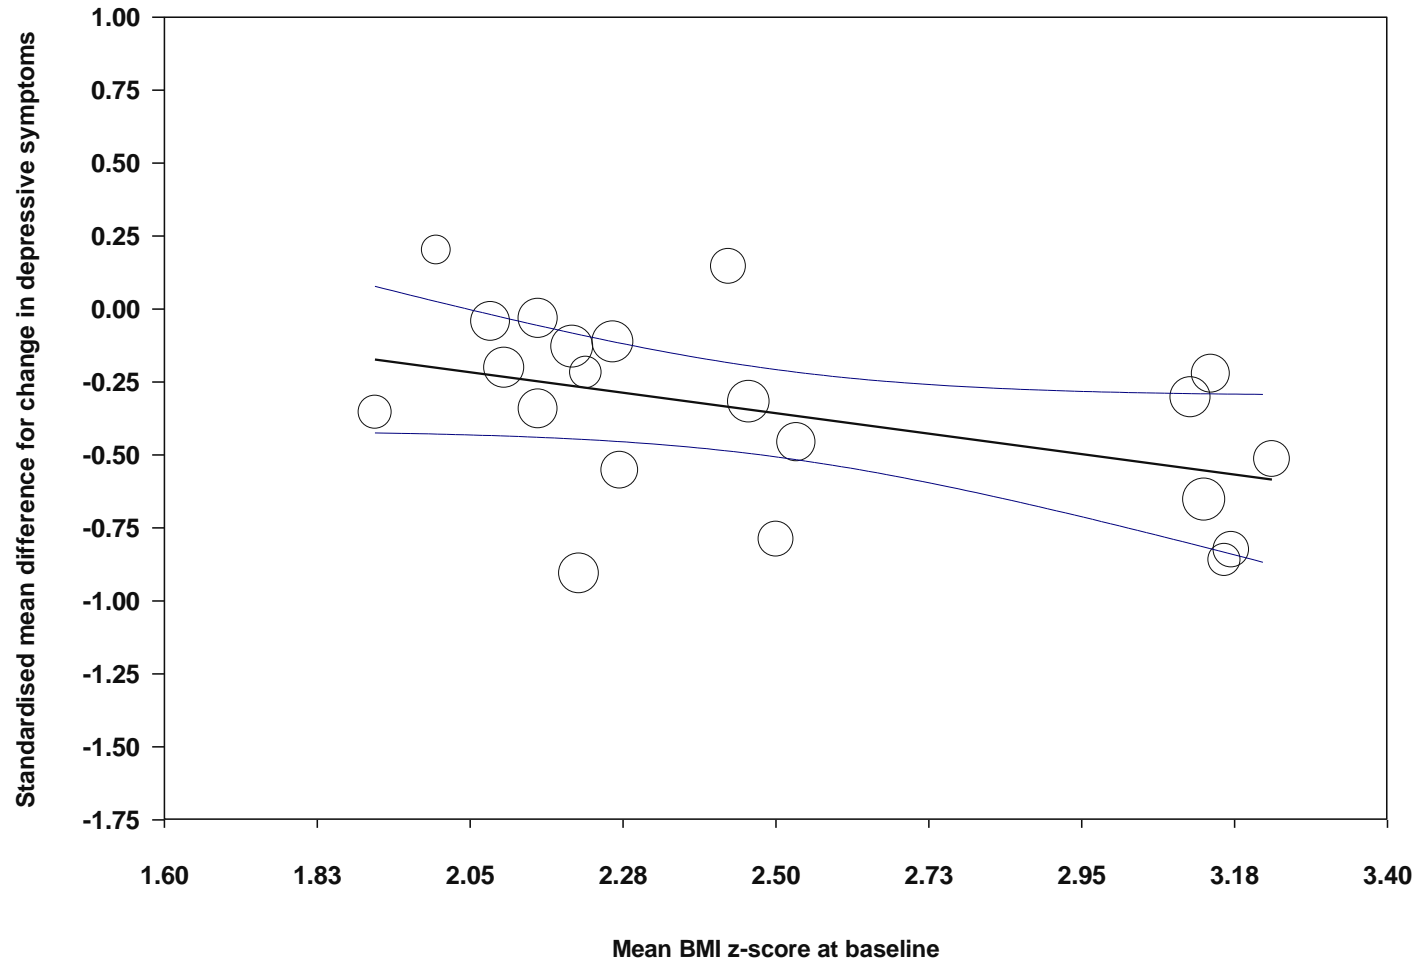

**eFigure 2.** Meta-regression of the effect size for change in symptoms of anxiety between pre- and post-intervention and intervention duration following professionally administered obesity treatment with a dietary component in children and adolescents with overweight and obesity ( $R^2=0.82$ ,  $p<0.001$ )

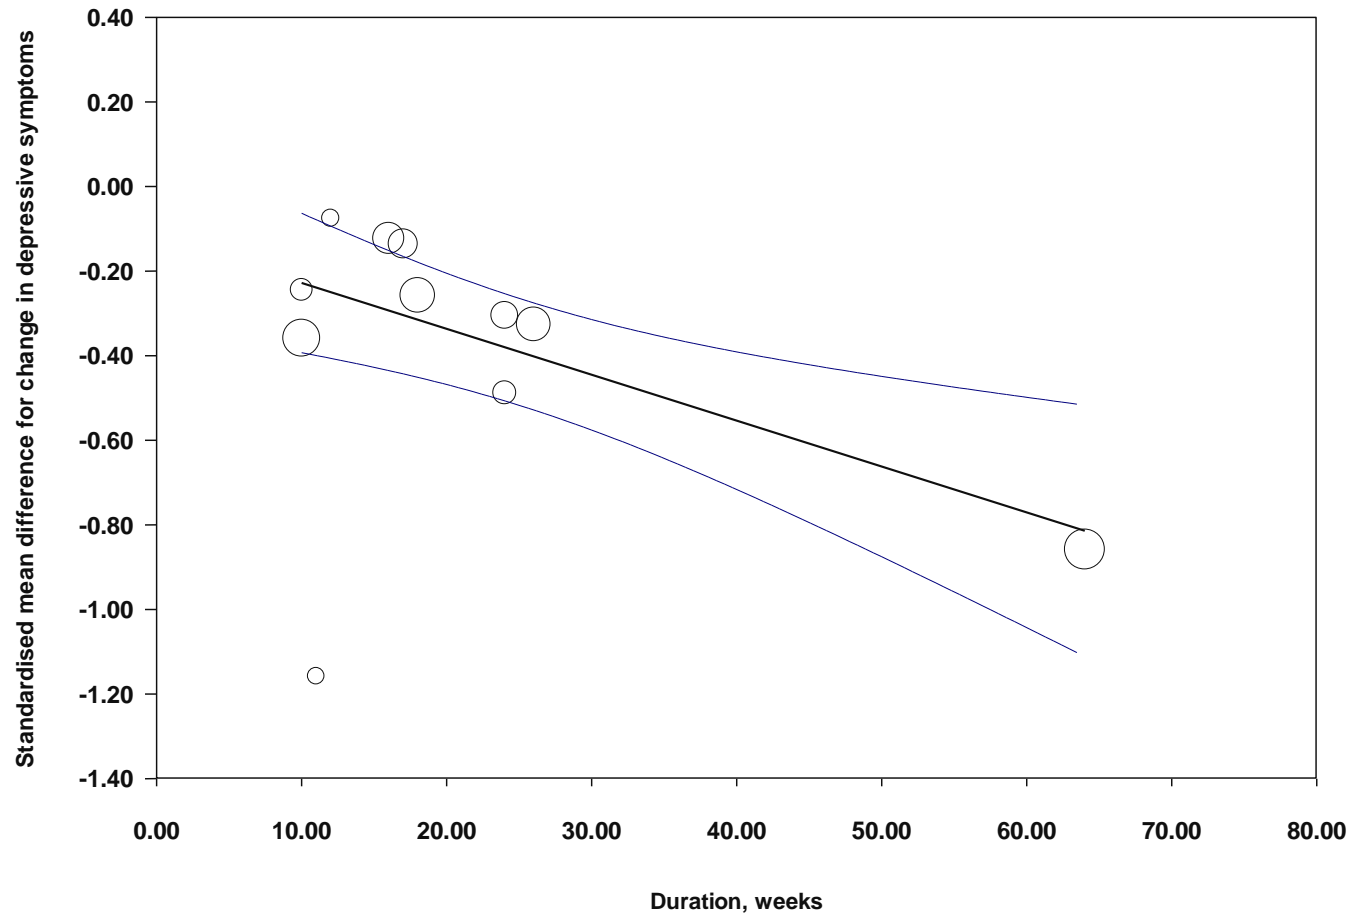

**eFigure 3.** Meta-analysis of the change in weight-related outcomes between pre- and post-intervention (A) and between baseline and the latest follow-up timepoint (B), following obesity treatment with a dietary component in children and adolescents with overweight and obesity

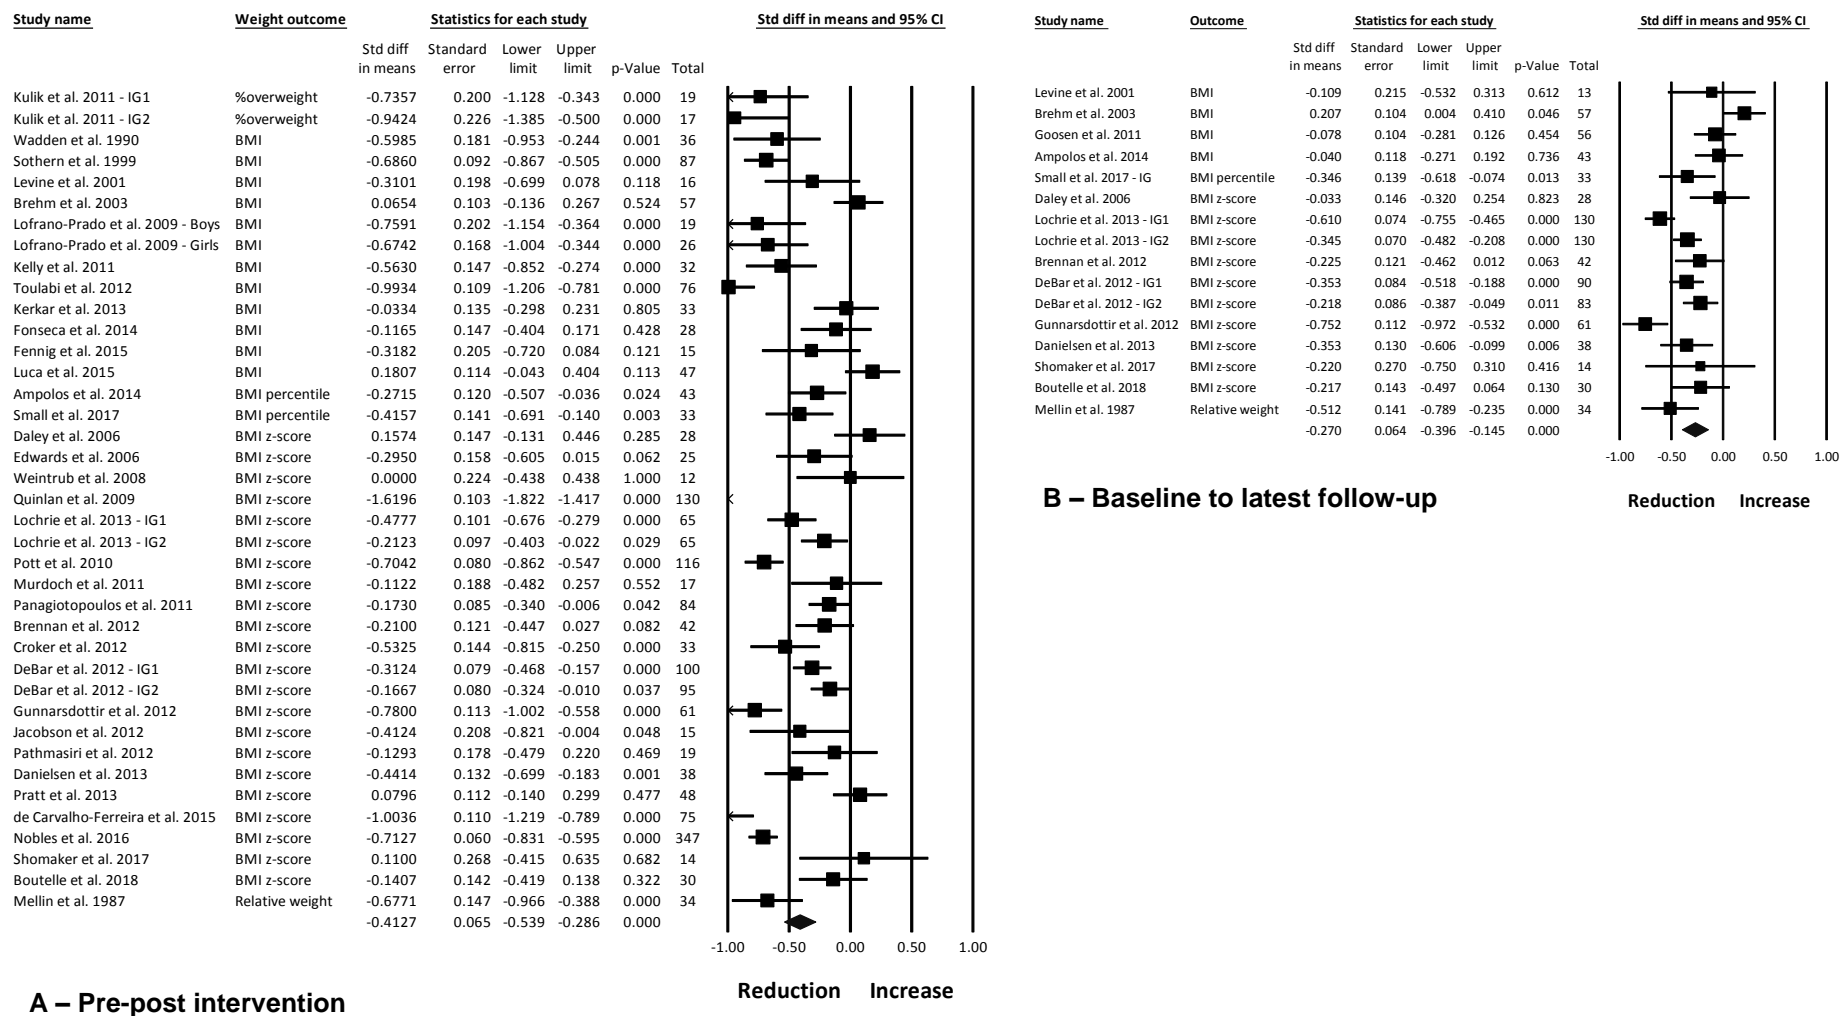

## eReferences

1. Ampolos L. The role of nutritional intake in weight and depressive symptomatology on children participating in family-based therapy for weight reduction. *Diss Abstr Int: Section B: The Sciences and Engineering*. 2014;74(8-B(E)):No Pagination Specified.
2. Boutelle KN, Braden A, Knatz-Peck S, Anderson LK, Rhee KE. An open trial targeting emotional eating among adolescents with overweight or obesity. *Eat Disord*. 2018;26(1):79-91.
3. Brehm BJ, Rourke KM, Cassell C, Sethuraman G. Psychosocial outcomes of a pilot multidisciplinary program for weight management. *Am J Health Behav*. 2003;27(4):348-354.
4. Brennan L, Wilks R, Walkley J, Fraser SF, Greenway K. Treatment acceptability and psychosocial outcomes of a randomised controlled trial of a cognitive behavioural lifestyle intervention for overweight and obese adolescents. *Behav Change*. 2012;29(1):36-62.
5. Croker H, Viner RM, Nicholls D, et al. Family-based behavioural treatment of childhood obesity in a UK National Health Service setting: randomized controlled trial. *Int J Obes*. 2012;36(1):16-26.
6. Daley AJ, Copeland RJ, Wright NP, Roalfe A, Wales JK. Exercise therapy as a treatment for psychopathologic conditions in obese and morbidly obese adolescents: a randomized, controlled trial. *Pediatrics*. 2006;118(5):2126-2134.
7. Danielsen YS, Nordhus IH, Juliusson PB, Maehle M, Pallesen S. Effect of a family-based cognitive behavioural intervention on body mass index, self-esteem and symptoms of depression in children with obesity (aged 7-13): a randomised waiting list controlled trial. *Obes Res Clin Pract*. 2013;7(2):e116-e128.
8. DeBar LL, Stevens VJ, Perrin N, et al. A primary care-based, multicomponent lifestyle intervention for overweight adolescent females. *Pediatrics*. 2012;129(3):e611-e620.
9. de Carvalho-Ferreira JP, Masquio DC, da Silveira Campos RM, et al. Is there a role for leptin in the reduction of depression symptoms during weight loss therapy in obese adolescent girls and boys? *Peptides*. 2015;65:20-28.
10. Edwards NM, Pettingell S, Borowsky IW. Where perception meets reality: self-perception of weight in overweight adolescents. *Pediatrics*. 2010;125(3):e452-458.
11. Fenner AA, Howie EK, Davis MC, Straker LM. Relationships between psychosocial outcomes in adolescents who are obese and their parents during a multi-disciplinary family-based healthy lifestyle intervention: one-year follow-up of a waitlist controlled trial (Curtin University's Activity, Food and Attitudes Program). *Health Qual Life Outcomes*. 2016;14(1):100.
12. Fennig S, Brunstein-Klomek A, Sasson A, Halifa Kurtzman I, Hadas A. Feasibility of a dual evaluation/intervention program for morbidly obese adolescents. *Isr J Psychiatry Relat Sci*. 2015;52(2):107-112.
13. Fonseca H, Palmeira AL, Martins S, Ferreira PD. Short- and medium-term impact of a residential weight-loss camp for overweight adolescents. *Int J Adolesc Med Health*. 2014;26(1):33-38.
14. Goldfield GS, Kenny GP, Alberga AS, et al. Effects of aerobic training, resistance training, or both on psychological health in adolescents with obesity: The HEARTY randomized controlled trial. *J Consult Clin Psychol*. 2015;83(6):1123-1135.
15. Goossens L, Braet C, Verbeken S, Decaluwe V, Bosmans G. Long-term outcome of pediatric eating pathology and predictors for the onset of loss of control over eating following weight-loss treatment. *Int J Eat Disord*. 2011;44(5):397-405.
16. Gunnarsdottir T, Njardvik U, Olafsdottir AS, Craighead L, Bjarnason R. Childhood obesity and co-morbid problems: effects of Epstein's family-based behavioural treatment in an Icelandic sample. *J Eval Clin Pract*. 2012;18(2):465-472.
17. Jacobson D. A primary care school age healthy choices intervention program. *Diss Abstr Int: Section B: The Sciences and Engineering*. 2009;70(4-B):2205.
18. Jacobson D, Melnyk BM. A primary care healthy choices intervention program for overweight and obese school-age children and their parents. *J Pediatr Health Care*. 2012;26(2):126-138.
19. Kelly NR, Mazzeo SE, Evans RK, et al. Physical activity, fitness and psychosocial functioning of obese adolescents. *Ment Health Phys Act*. 2011;4(1):31-37.



20. Kerkar N, D'Urso C, Van Nostrand K, et al. Psychosocial outcomes for children with nonalcoholic fatty liver disease over time and compared with obese controls. *J Pediatr Gastroenterol Nutr.* 2013;56(1):77-82.
21. Kotler LA, Etu SF, Davies M, Devlin MJ, Attia E, Walsh BT. An open trial of an intensive summer day treatment program for severely overweight adolescents. *Eat Weight Disord.* 2006;11(4):e119-122.
22. Kulik N. Social support and weight loss among adolescent females. *Diss Abstr Int: Section B: The Sciences and Engineering.* 2012;73(6-B):3568.
23. Lane-Tillerson C, Davis BL, Killion CM, Baker S. Evaluating nursing outcomes: a mixed-methods approach. *J Natl Black Nurses Assoc.* 2005;16(2):20-26.
24. Levine MD, Ringham RM, Kalarchian MA, Wisniewski L, Marcus MD. Is family-based behavioral weight control appropriate for severe pediatric obesity? *Int J Eat Disord.* 2001;30(3):318-328.
25. Lochrie A, Wysocki T, Hossain J, Milkes A, Antal H, Buckloh L, Lang J. The effects of a family-based intervention (FBI) for overweight/obese children on health and psychological functioning. *Clin Pract Pediatr Psych.* 2013;1(2):159-170. doi:10.1037/cpp0000020
26. Lofrano-Prado MC, Antunes HK, do Prado WL, et al. Quality of life in Brazilian obese adolescents: effects of a long-term multidisciplinary lifestyle therapy. *Health Qual Life Outcomes.* 2009;7:61.
27. Luca P, Dettmer E, Khoury M, et al. Adolescents with severe obesity: outcomes of participation in an intensive obesity management programme. *Pediatr Obes.* 2015;10(4):275-282.
28. Mellin LM, Slinkard LA, Irwin CE, Jr. Adolescent obesity intervention: validation of the SHAPEDOWN program. *J Am Diet Assoc.* 1987;87(3):333-338.
29. Moon YI, Park HR, Koo HY, Kim HS. Effects of behavior modification on body image, depression and body fat in obese Korean elementary school children. *Yonsei Med J.* 2004;45(1):61-67.
30. Munsch S, Roth B, Michael T, et al. Randomized controlled comparison of two cognitive behavioral therapies for obese children: mother versus mother-child cognitive behavioral therapy. *Psychother Psychosom.* 2008;77(4):235-246.
31. Murdoch M, Payne N, Samani-Radia D, et al. Family-based behavioural management of childhood obesity: service evaluation of a group programme run in a community setting in the United Kingdom. *Eur J Clin Nutr.* 2011;65(6):764-767.
32. Nobles J, Radley D, Dimitri P, Sharman K. Psychosocial interventions in the treatment of severe adolescent obesity: The SHINE program. *J Adolesc Health.* 2016;59(5):523-529.
33. Panagiotopoulos C, Ronsley R, Al-Dubayee M, et al. The centre for healthy weights--shapedown BC: a family-centered, multidisciplinary program that reduces weight gain in obese children over the short-term. *Int J Environ Res Public Health.* 2011;8(12):4662-4678.
34. Pathmasiri W, Pratt KJ, Collier DN, Lutes LD, McRitchie S, Sumner SCJ. Integrating metabolomic signatures and psychosocial parameters in responsivity to an immersion treatment model for adolescent obesity. *Metabolomics.* 2012;8(6):1037-1051.
35. Pott W, Albayrak O, Hebebrand J, Pauli-Pott U. Course of depressive symptoms in overweight youth participating in a lifestyle intervention: associations with weight reduction. *J Dev Behav Pediatr.* 2010;31(8):635-640.
36. Pratt KJ, Lazorick S, Lamson AL, Ivanescu A, Collier DN. Quality of life and BMI changes in youth participating in an integrated pediatric obesity treatment program. *Health Qual Life Outcomes.* 2013;11:116.
37. Quinlan NP, Kolotkin RL, Fuemmeler BF, Costanzo PR. Psychosocial outcomes in a weight loss camp for overweight youth. *Int J Pediatr Obes.* 2009;4(3):134-142.
38. Shomaker LB, Tanofsky-Kraff M, Matherne CE, et al. A randomized, comparative pilot trial of family-based interpersonal psychotherapy for reducing psychosocial symptoms, disordered-eating, and excess weight gain in at-risk preadolescents with loss-of-control-eating. *Int J Eat Disord.* 2017;50(9):1084-1094.
39. Small L, Thacker L, II, Aldrich H, Bonds-McClain D, Melnyk B. A pilot intervention designed to address behavioral factors that place overweight/obese young children at risk for later-life obesity. *West J Nurs Res.* 2017;39(8):1192-1212.
40. Sothorn MS, von Almen TK, Schumacher HD, Suskind RM, Blecker U. A multidisciplinary approach to the treatment of childhood obesity. *Del Med J.* 1999;71(6):255.

41. Stella S, Vilar A, Lacroix C, et al. Effects of type of physical exercise and leisure activities on the depression scores of obese Brazilian adolescent girls. *Braz J Med Biol Res.* 2005;38(11):1683-1689.
42. Toulabi T, Khosh Niyat Nikoo M, Amini F, Nazari H, Mardani M. The influence of a behavior modification interventional program on body mass index in obese adolescents. *J Formos Med Assoc.* 2012;111(3):153-159.
43. Van Vlierberghe L, Braet C, Goossens L, Rosseel Y, Mels S. Psychological disorder, symptom severity and weight loss in inpatient adolescent obesity treatment. *Int J Pediatr Obes.* 2009;4(1):36-44.
44. Wadden TA, Stunkard AJ, Rich L, Rubin CJ, Sweidel G, McKinney S. Obesity in black adolescent girls: a controlled clinical trial of treatment by diet, behavior modification, and parental support. *Pediatrics.* 1990;85(3):345-352.
45. Weintraub DL, Tirumalai EC, Haydel KF, Fujimoto M, Fulton JE, Robinson TN. Team sports for overweight children: the Stanford Sports to Prevent Obesity Randomized Trial (SPORT). *Arch Pediatr Adolesc Med.* 2008;162(3):232-237.
